# Supplementary material for: Population-level analysis reveals the widespread occurrence and phenotypic consequence of DNA methylation variation not tagged by genetic variation in maize
Source: PubMed Central journal article supplement (PMC6862797; doi:10.1186/s13059-019-1859-0), 2019-11-19
Supplement: 13059_2019_1859_MOESM1_ESM.pdf [file 13059_2019_1859_MOESM1_ESM.pdf]

# Population-level analysis reveals the widespread occurrence and phenotypic consequence of DNA methylation variation not tagged by genetic variation

Jing Xu<sup>a,1</sup>, Guo Chen<sup>a,b,1</sup>, Peter J. Hermanson<sup>c</sup>, Qiang Xu<sup>a</sup>, Changshuo Sun<sup>a</sup>, Wenqing Chen<sup>a</sup>, Qiuxin Kan<sup>a</sup>, Minqi Li<sup>a</sup>, Peter A. Crisp<sup>c,d</sup>, Jianbing Yan<sup>a</sup>, Lin Li<sup>a</sup>, Nathan M. Springer<sup>c,e,\*</sup>, Qing Li<sup>a,\*</sup>

<sup>a</sup> National Key Laboratory of Crop Genetic Improvement, Huazhong Agricultural University, Wuhan 430070, China

<sup>b</sup> Institute of Nuclear and Biological Technology, Xinjiang Academy of Agricultural Sciences, Urumqi 830091, China

<sup>c</sup> Department of Plant and Microbial Biology, University of Minnesota, St. Paul, MN 55108, USA

<sup>d</sup> @pete\_crisp

<sup>e</sup> @SpringerNathan

<sup>1</sup> Contributed equally

\* Co-corresponding author

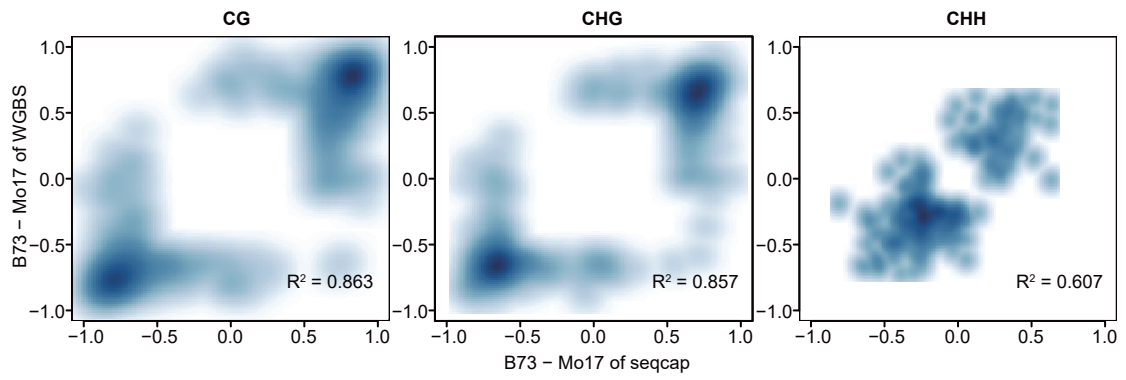

**Figure S1.** DMR validation. Comparison between DNA methylation of the capture based assay and the whole genome bisulfite sequencing assay (WGBS) in DMRs between B73 and Mo17. The x-axis is values of methylation levels in B73 minus Mo17 from the capture based assay and the y-axis is the corresponding from the WGBS assay.

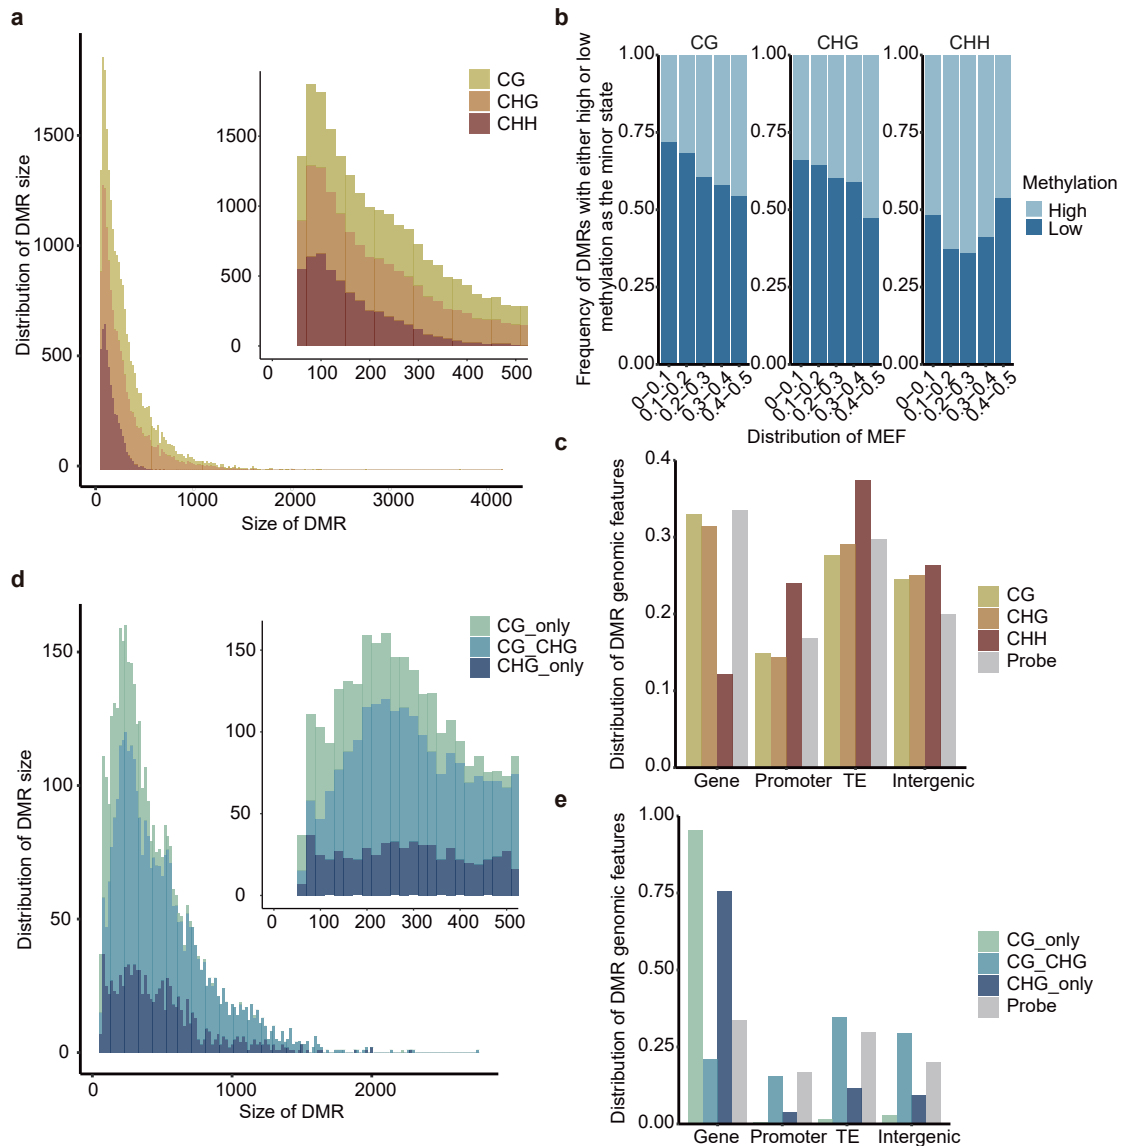

**Figure S2.** Distribution of DMR size and genomic features. **a** DMR size distribution for the three sequence contexts. **b** Frequency of DMRs with either high or low methylation as the minor state at different minor epiallele frequency (MEF) for the three sequence contexts. **c** The genomic feature that overlaps with DMRs for each of the three sequence contexts is shown. **d** Size distribution of context-specific DMRs. **e** The distribution of genomic annotations that overlap with context-specific DMRs is shown relative to the annotations for all probed regions (grey).

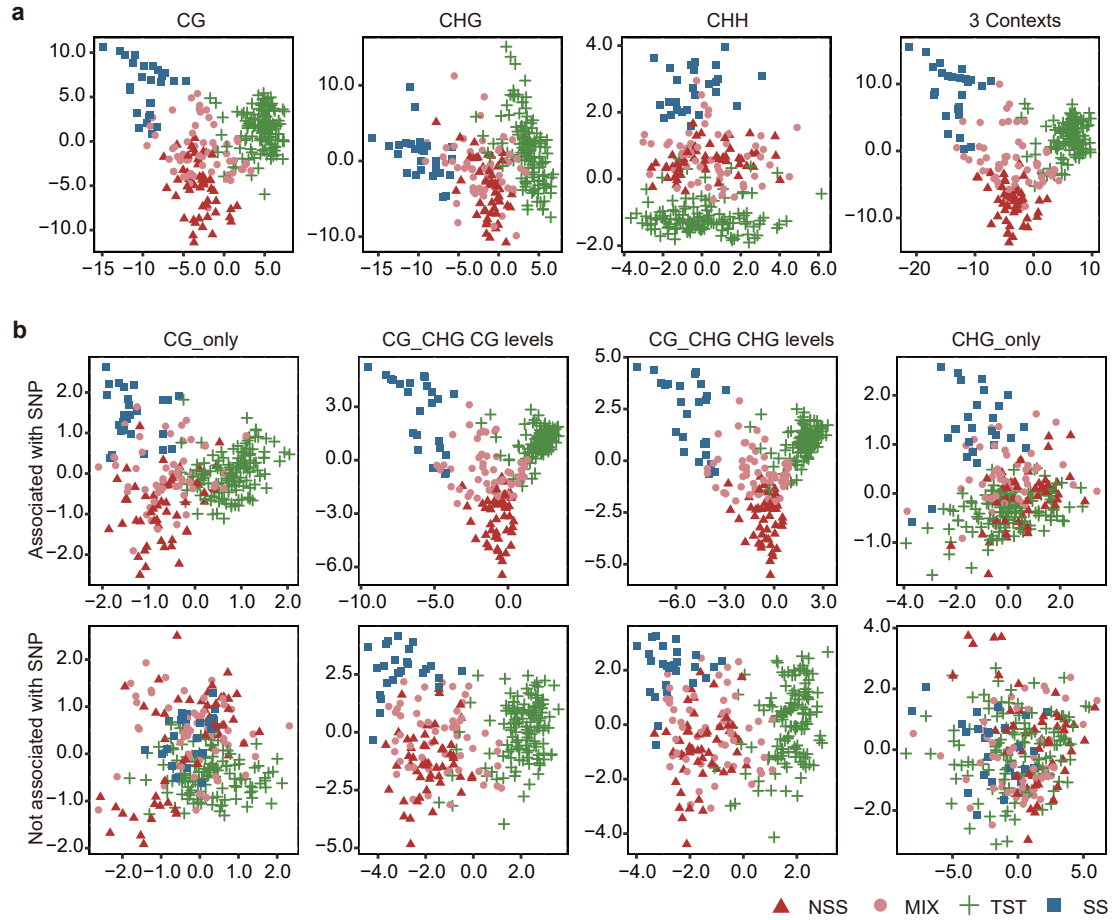

**Figure S3.** DNA methylation can reflect genetic distances. **a** PCA plots to differentiate maize subgroups using DNA methylation in the indicated sequence context. **b** PCA plots of context-specific DMRs with or without significant associations with SNPs. SS, stiff stalk; NSS, non-stiff stalk; TST, tropical or semi-tropical.

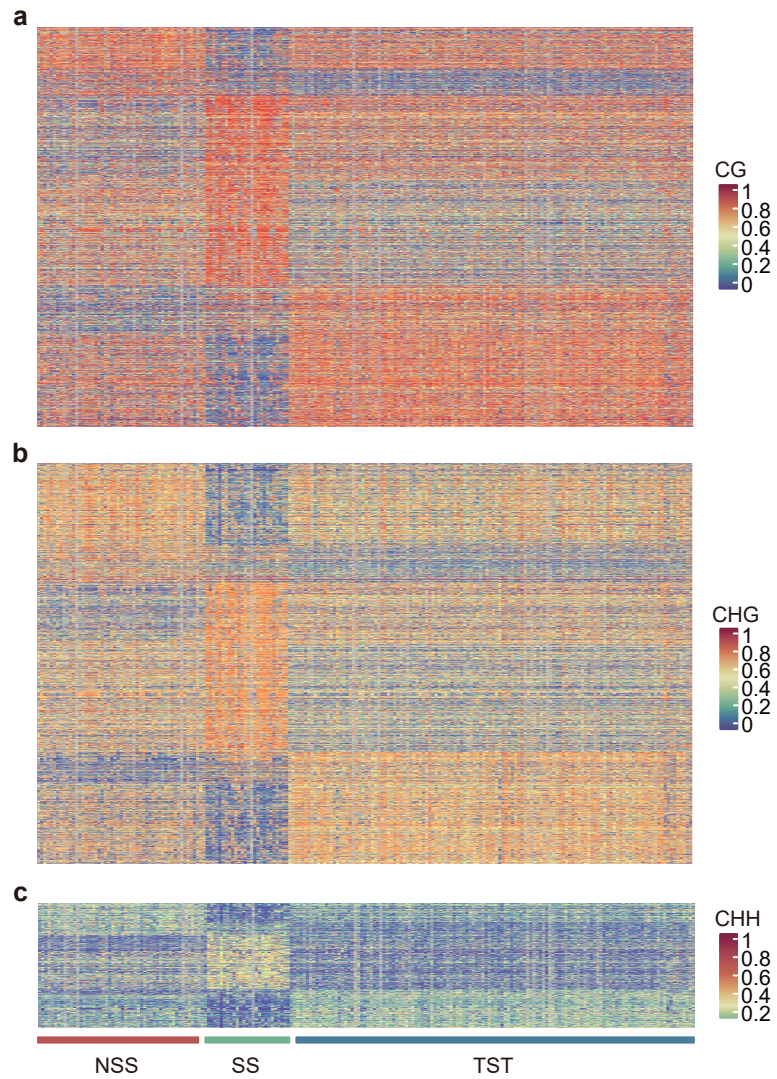

**Figure S4.** DNA methylation levels in DMRs are different among maize subgroups. **a** A total of 2129 CG DMRs are different among the three maize subgroups. **b** A total of 2154 CHG DMRs are different among the three maize subgroups. **c** A total of 659 CHH DMRs are different among the three maize subgroups. SS, stiff stalk; NSS, non-stiff stalk; TST, tropical or semi-tropical.

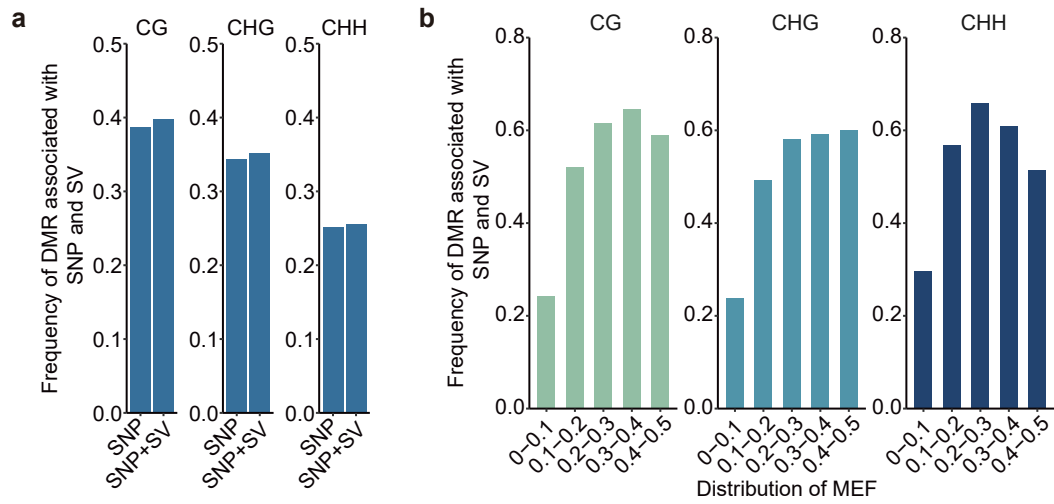

**Figure S5.** Summary of DMRs associated with SNPs and structure variants (SVs). **a** Frequency of DMRs associated with SNP/SV. **b** Frequency of DMRs associated with SNP/SV at different minor allele frequency (MEF).

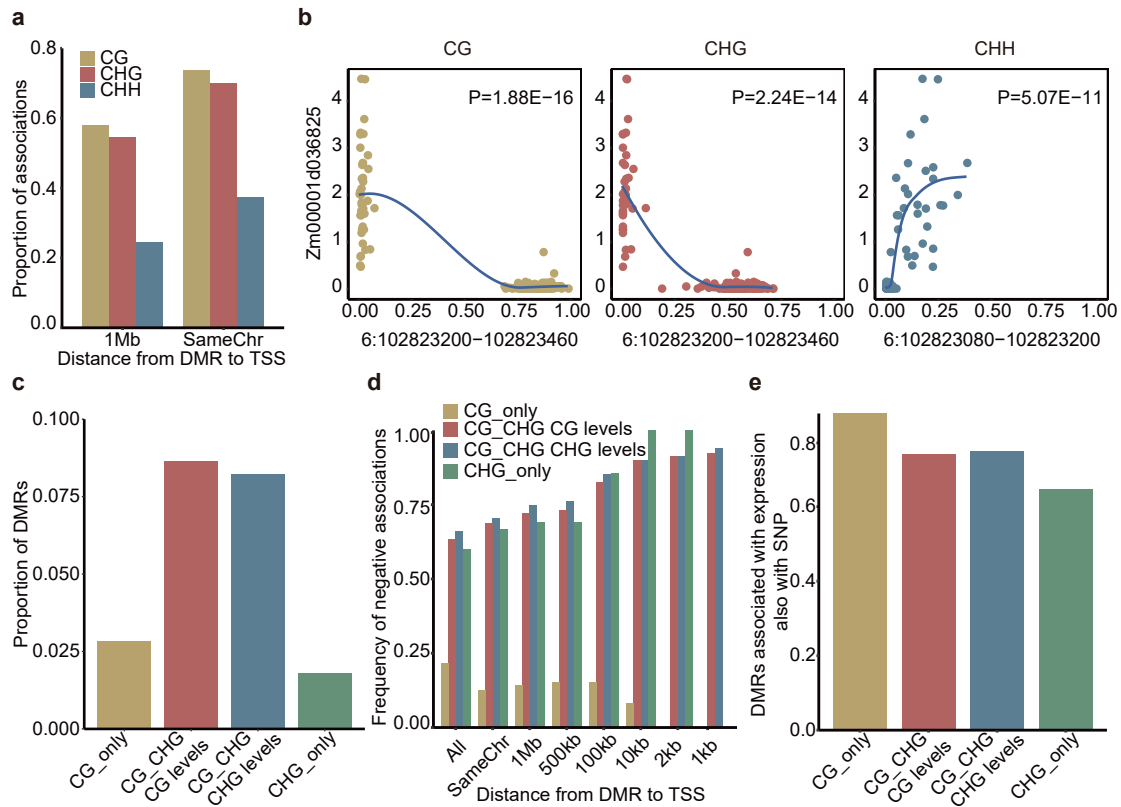

**Figure S6.** The associations between gene expression and DNA methylation. **a** The proportion of DMR-gene associations for which the DMR and the gene are located on the same chromosome (SameChr) or within 1 Mb of each other. **b** An example which shows that all three contexts within a DMR can associate with expression of the same gene. **c** The proportion of context-specific DMRs having associations with gene expression. **d** Summary plot to show the proportion of negative associations for context-specific DMRs with varying distance to gene TSS. **e** The proportion of context-specific DMRs that are associated with gene expression and with SNPs.

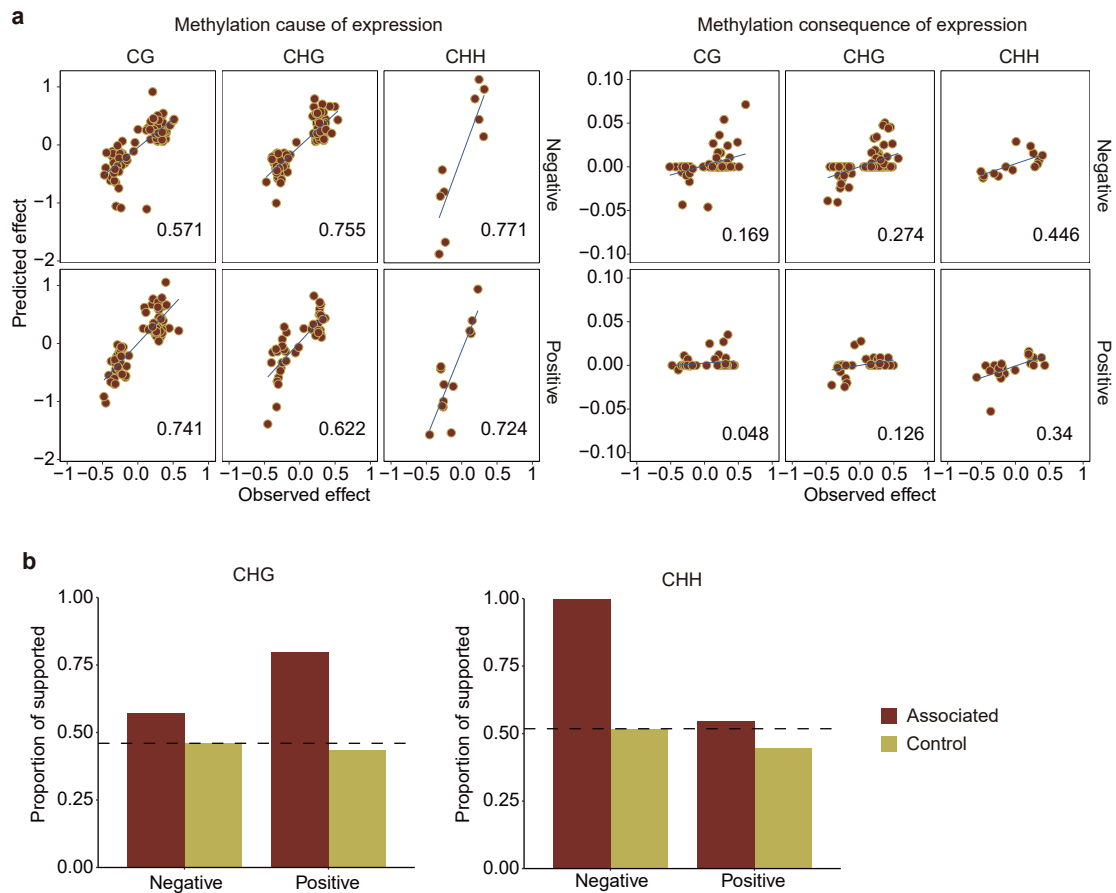

**Figure S7.** DMRs affect gene expression as a cause. **a** Results for the causality analysis of DNA methylation and gene expression. The squared Pearson correlation coefficient ( $R^2$ ) between observed and predicted effect is shown in the right bottom of each plot. The blue line is the fitted curve of observed and predicted effect. **b** Validation of the causal effect of DMR on gene expression in *ddm1* mutant. Only DMR-gene pairs that show consistent direction of associations were considered “supported”. Control is the top 5,000 non-significant DMR-gene associations.



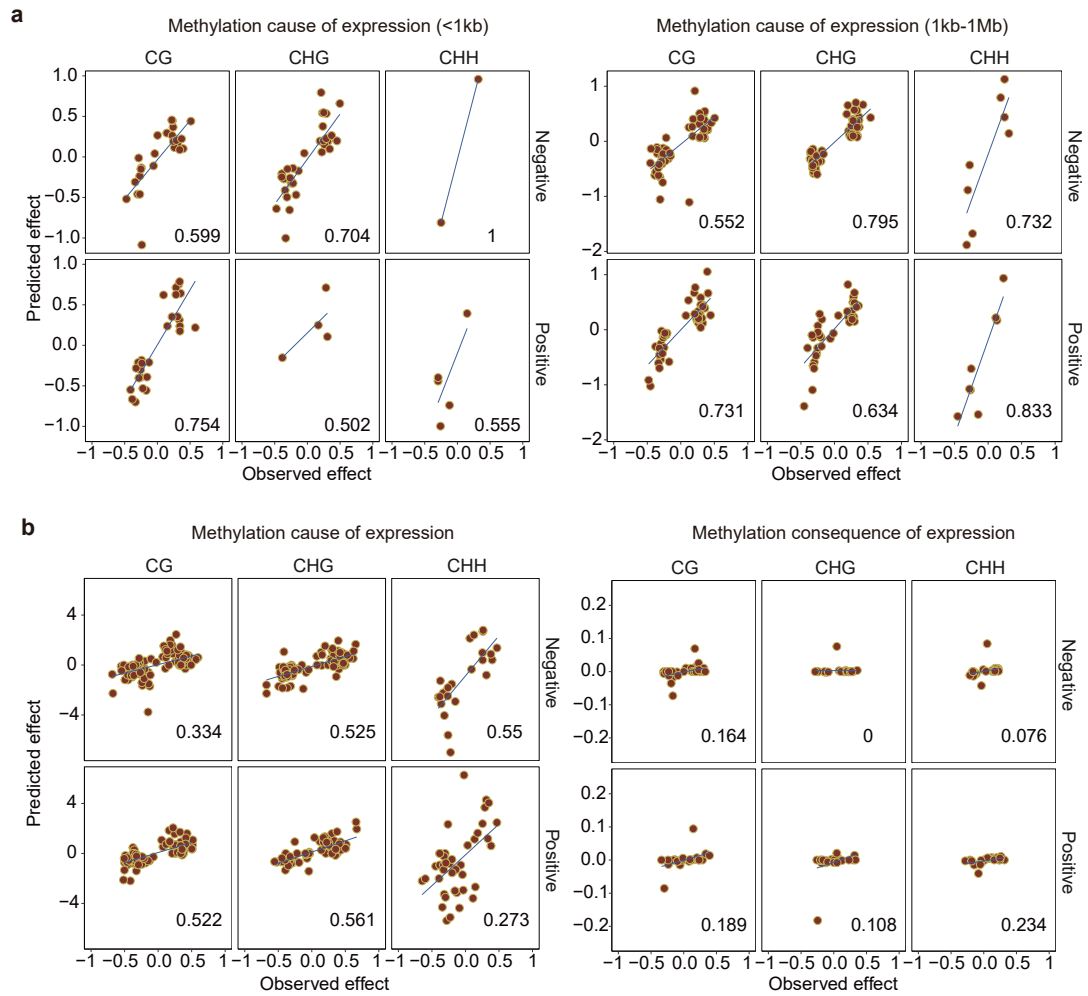

**Figure S8.** Mendelian randomization analysis. **a** Mendelian randomization test splitting by distance between DMR and gene in kernel. **b** Mendelian randomization test of all DMR-gene associations in leaf.

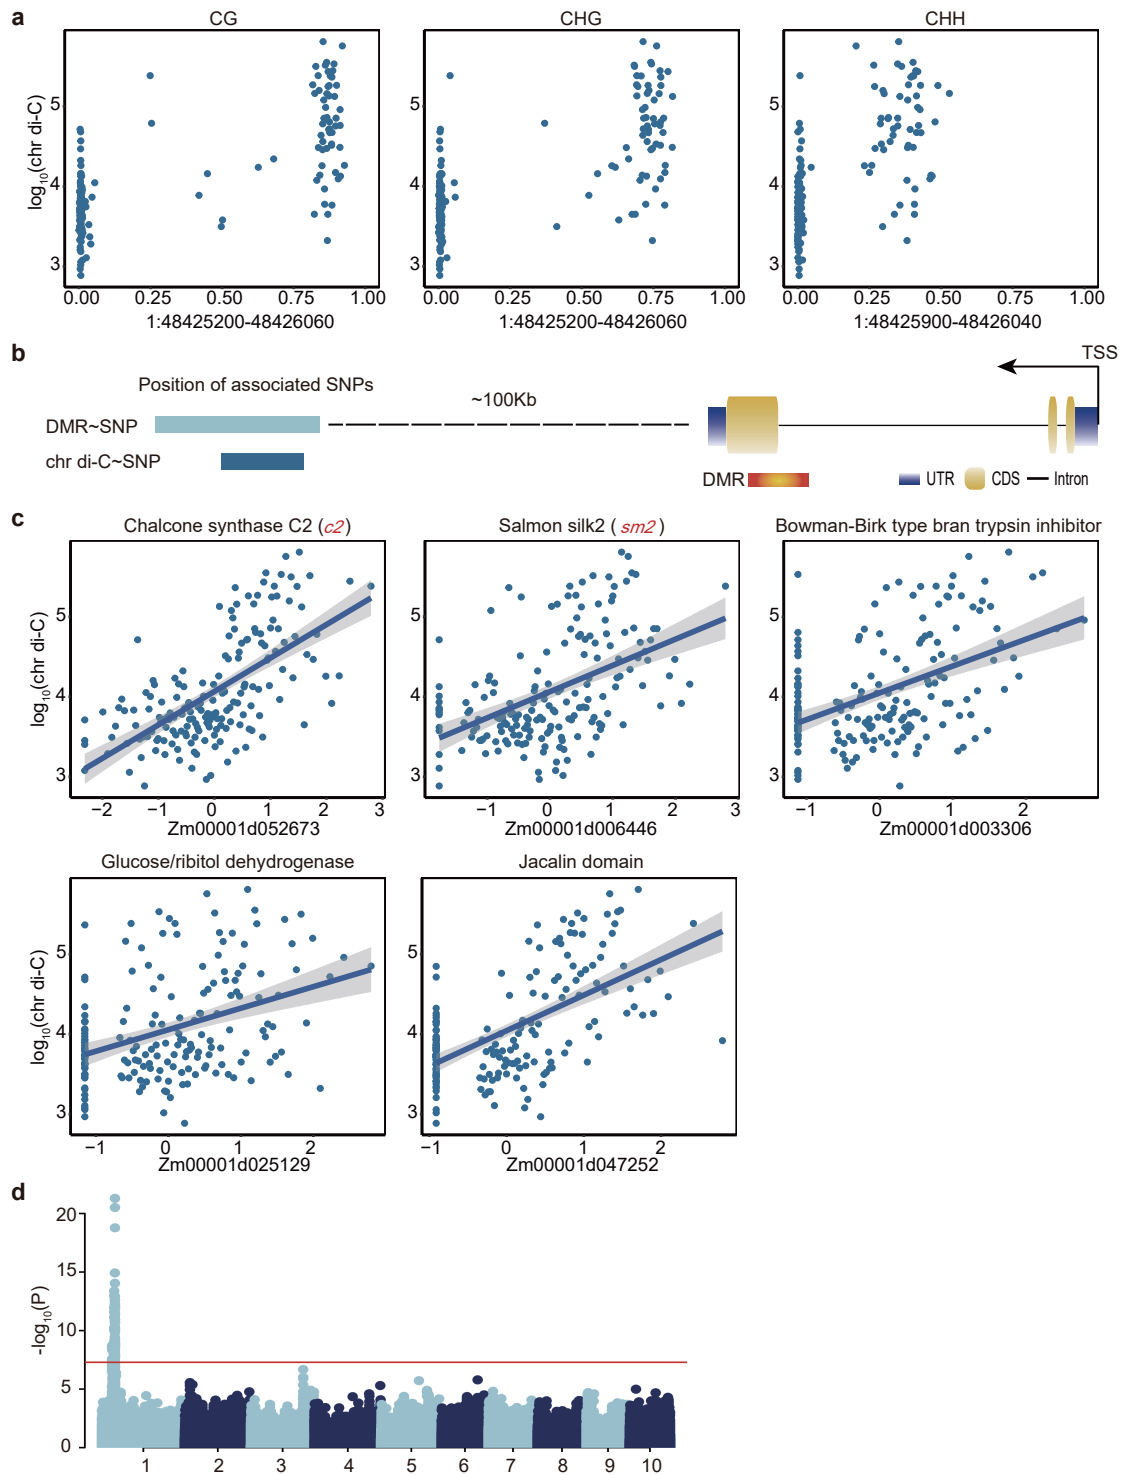

**Figure S9.** The association between DMR and metabolic trait chr di-C. **a** The correlations between chr di-C content and CG/CHG/CHH methylation of the DMR. **b** The relative position of the DMR, the SNPs associated with the DMR, and the SNPs associated with chr di-C content. **c** The associations between chr di-C content and the expression levels of the five genes that are significantly associated with the DMR. **d** The DMR affecting chr di-C is also associated with genetic variation.
